# Supplementary material
Source: Springer Nature journal article supplement (https://www.springermedizin.de/resource/supplementary/13075_2004_1655_MOESM2_ESM.pdf/9690272)

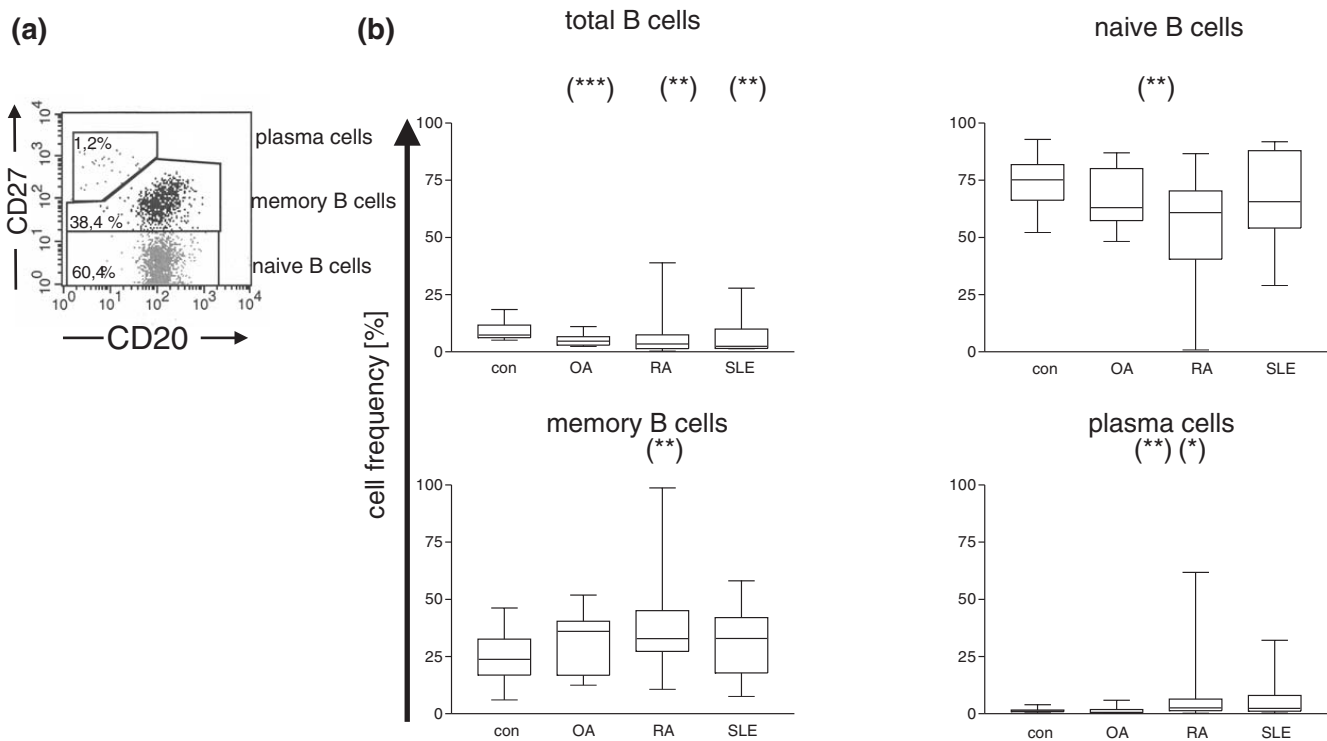

Supplement: MOESM2 [file 9690272]
